# Supplementary material for: Isoliquiritigenin modulates miR-374a/PTEN/Akt axis to suppress breast cancer tumorigenesis and metastasis
Source: PubMed Central journal article supplement (PMC5567123; doi:10.1038/s41598-017-08422-y), 2017-08-21
Supplement: 41598_2017_8422_MOESM1_ESM.pdf [file 41598_2017_8422_MOESM1_ESM.pdf]

# SUPPLEMENTAL INFORMATION

Supplementary Figure 1-10

Supplementary Table 1-3

## **Isoliquiritigenin modulates miR-374a/PTEN/Akt axis to suppress breast cancer tumorigenesis and metastasis**

Fu Peng<sup>1,2,3#</sup>, Hailin Tang<sup>1,4#</sup>, Peng Liu<sup>4</sup>, Jiangang Shen<sup>1</sup>, Xinyuan Guan<sup>5</sup>, Xiaofang Xie,<sup>2,3</sup> Jihai Gao<sup>2,3</sup>, Liang Xiong<sup>2,3</sup>, Lei Jia<sup>1</sup>, Jianping Chen<sup>1,2\*</sup>, & Cheng Peng<sup>2,3\*</sup>

<sup>1</sup>School of Chinese Medicine, The University of Hong Kong, Pokfulam, Hong Kong

<sup>2</sup>Chengdu University of Traditional Chinese Medicine, Chengdu, China

<sup>3</sup>State Key Laboratory Breeding Base of Systematic Research, Development and Utilization of Chinese Medicine Resources, Sichuan Province and Ministry of Science and Technology, Chengdu, China

<sup>4</sup>Department of Breast Oncology, Sun Yat-sen University Cancer Center; State Key Laboratory of Oncology in South China; Collaborative Innovation Center of Cancer Medicine, Guangzhou, China

<sup>5</sup>Department of Clinical Oncology, Li Ka Shing Faculty of Medicine, the University of Hong Kong, Hong Kong

---

\* **Corresponding author:** Jianping Chen, School of Chinese Medicine, The University of Hong Kong, 10 Sassoon Road, Pokfulam, Hong Kong. E-mail: abchen@hku.hk ; Cheng Peng, Chengdu University of Traditional Chinese Medicine, Chengdu, China. Email: pengchengchengdu@126.com

# Two authors equally contributed to this work.

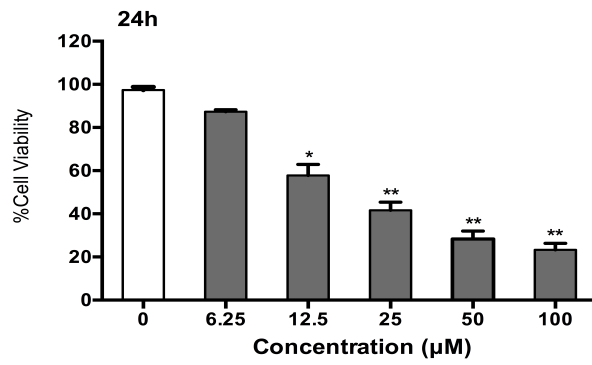

**Supplementary Figure 1. MTT analysis demonstrated that ISL had an inhibitory effect on primary breast cancer proliferation in a dose-dependent manner. MTT was used to determine the anti-proliferation effect of ISL on primary breast cancer after 24h treatment.**

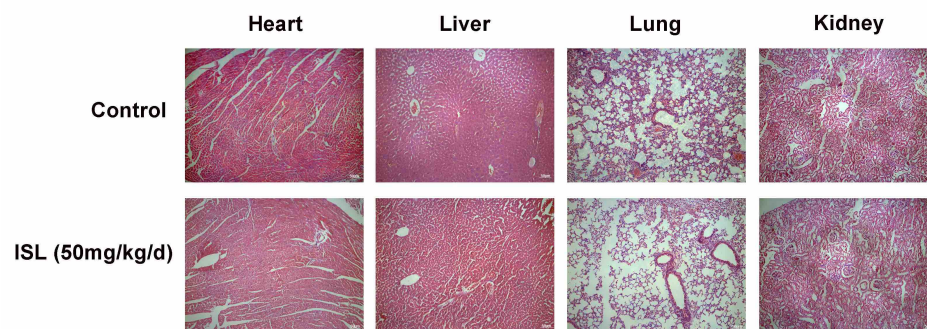

**Supplementary Figure 2. HE analysis demonstrated that ISL had little influences on the micro-morphology of normal tissues. HE staining was used to determine the effect of ISL on the heart, liver, lung and kidney.**



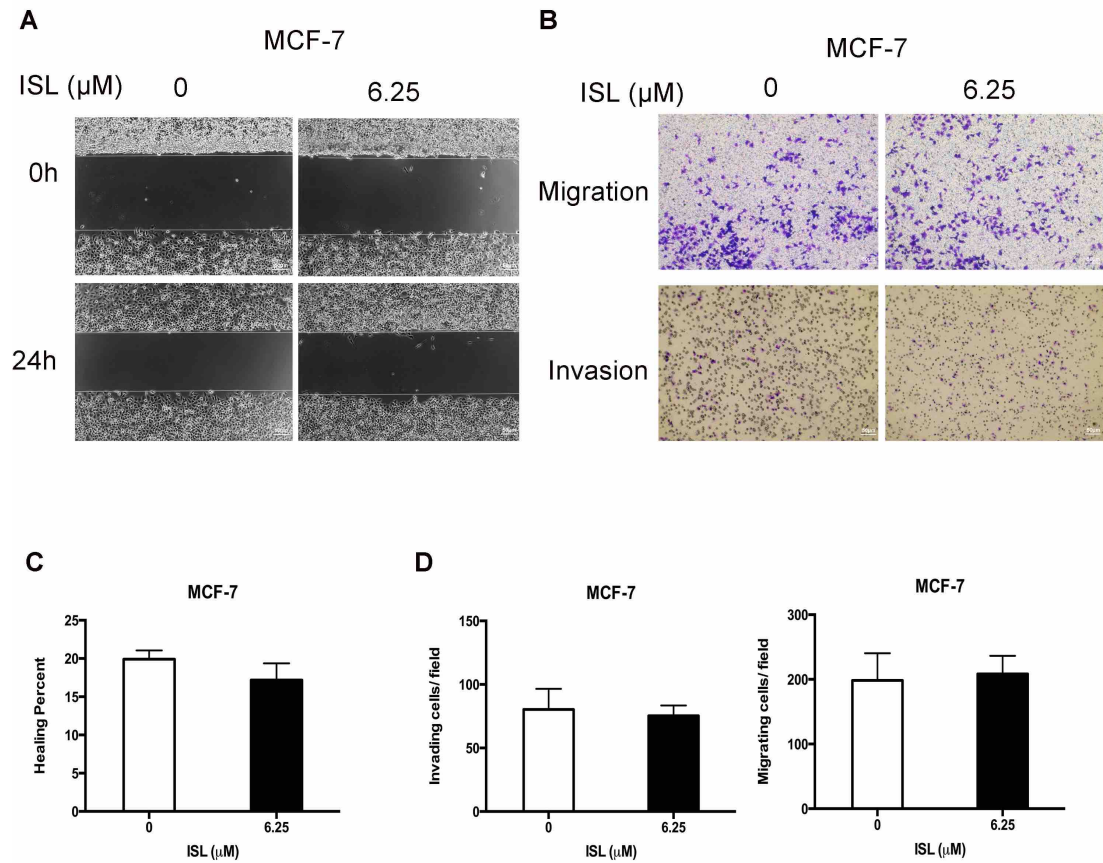

**Supplementary Figure 4. ISL demonstrated no obvious inhibitory effect on MCF-7 migration and invasion. (A, C) The effect of ISL on MCF-7 migration was determined by wound healing assay. (B, D) The effect of ISL on MCF-7 migration and invasion was determined by chamber assay.**

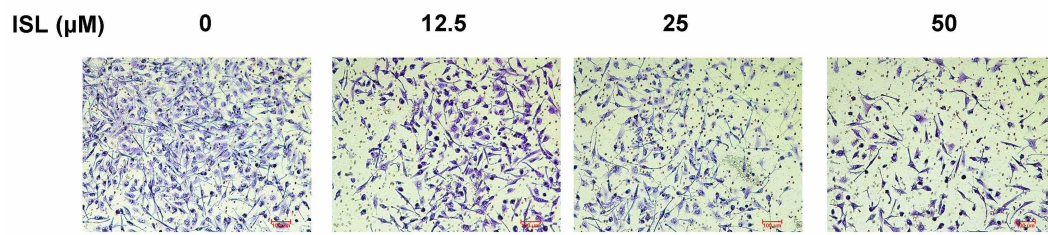

**Supplementary Figure 5. ISL demonstrated an inhibitory effect on primary breast cancer invasion in a dose-dependent manner.** The effect of ISL on primary breast cancer invasion was determined by chamber assay.

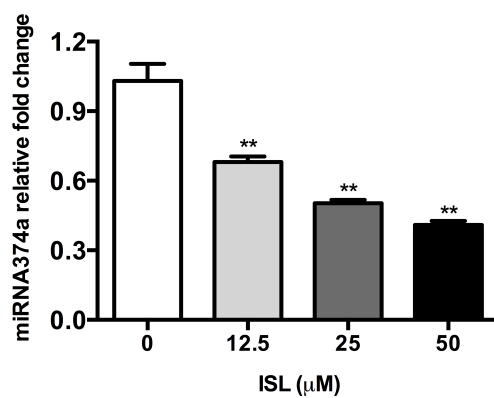

**Supplementary Figure 6. Real-time PCR analysis of primary breast cancer indicated that ISL could inhibit miR-374a expression dose-dependently.** Real-time PCR was used to determine the effect of ISL on primary breast cancer miR-374a expression with 24h intervention.

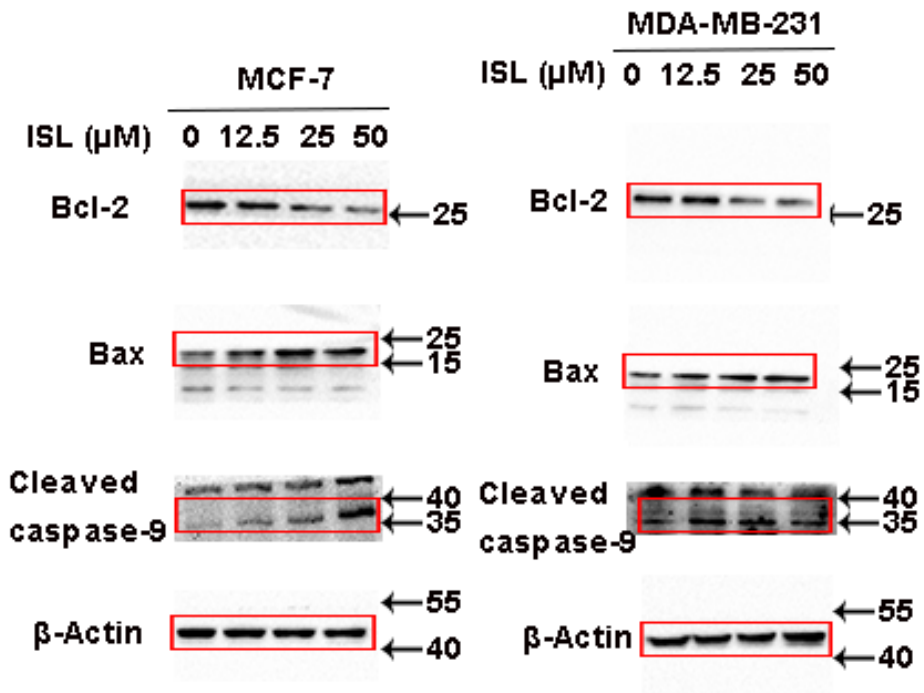

**Supplementary Figure 7.** Full-length images of the immunoblots. Red line boxes indicate the cropped images used in Figure 1D.  $\beta$ -actin was used as an internal control. The same set of protein samples was charged in all gels. Arrowheads indicate the position of protein markers.

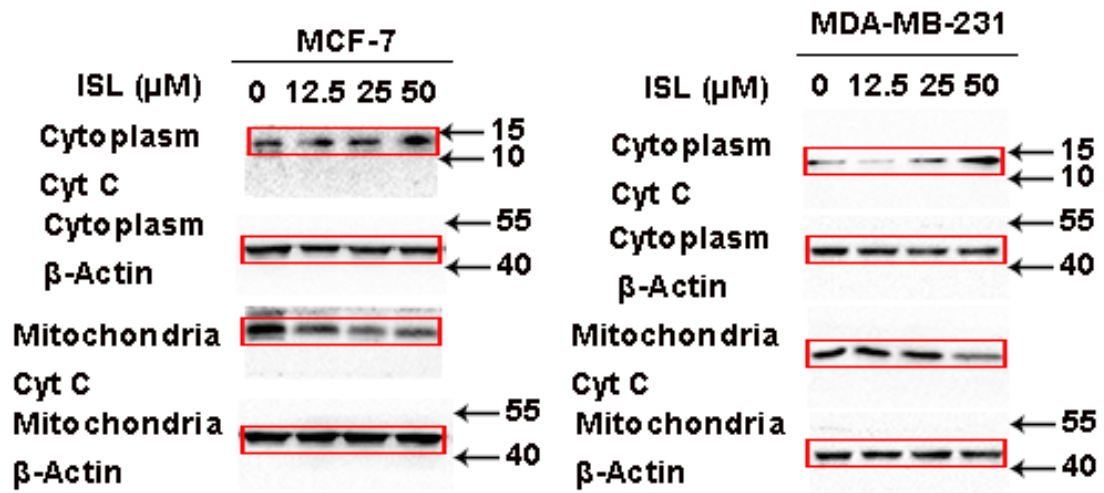

**Supplementary Figure 8.** Full-length images of the immunoblots. Red line boxes indicate the cropped images used in Figure 1E.  $\beta$ -actin was used as an internal control. The same set of protein samples was charged in all gels. Arrowheads indicate the position of protein markers.

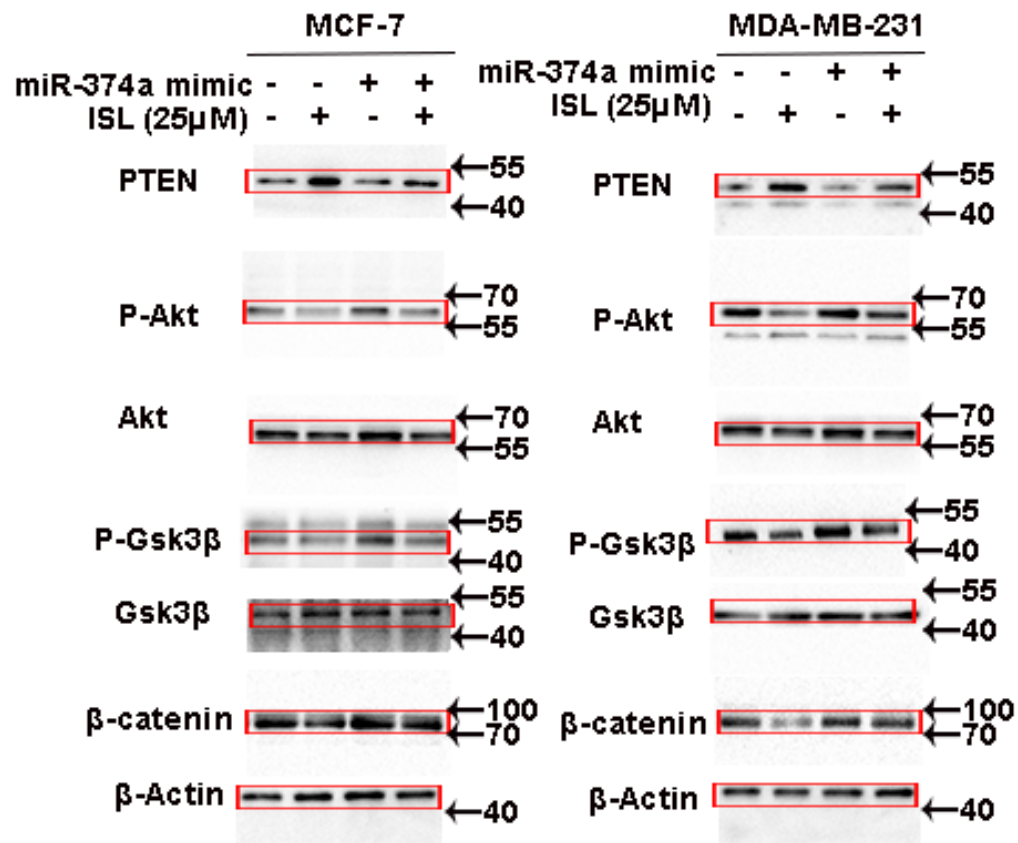

**Supplementary Figure 9.** Full-length images of the immunoblots. Red line boxes indicate the cropped images used in Figure 6D.  $\beta$ -actin was used as an internal control. The same set of protein samples was charged in all gels. Arrowheads indicate the position of protein markers.



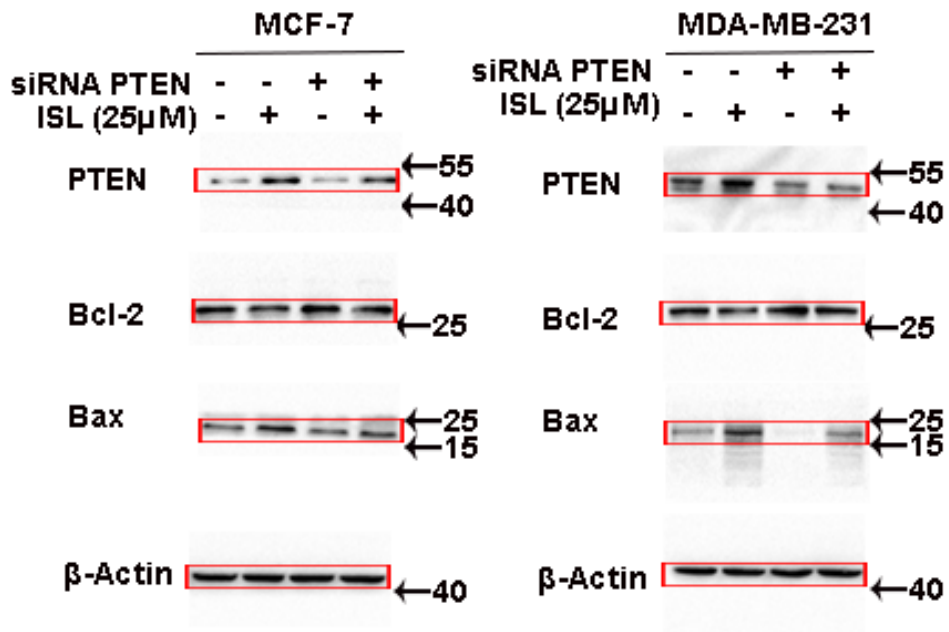

**Supplementary Figure 10.** Full-length images of the immunoblots. Red line boxes indicate the cropped images used in Figure 7G.  $\beta$ -actin was used as an internal control. The same set of protein samples was changed in all gels. Arrowheads indicate the position of protein markers.

**Table S1. The primers used for Real-time RT-PCR**

|              |                            |
|--------------|----------------------------|
| <b>PTEN</b>  | (F) AACGCTTCACGAATTTGCGT   |
|              | (R) AGAGGAGCAGCCGCAGAAATG  |
| <b>BAX</b>   | (F) CCGCCGTGGACACAGACT     |
|              | (R) TTGAAGTTGCCGTCAGAAAACA |
| <b>BCL-2</b> | (F) CTGGGAATCGATCTGGAAATCC |
|              | (R) TGCATAAGGCAACGATCCCATC |
| <b>GAPDH</b> | (F) GACTCATGACCACAGTCCATGC |
|              | (R) AGAGGCAGGGATGATGTTCTG  |
| <b>U6</b>    | (F) CTCGCTTCGGCAGCACA      |
|              | (R) AACGCTTCACGAATTTGCGT   |

**Table S2. The oligo sequences of siRNA PTEN**

|               |                                   |
|---------------|-----------------------------------|
| <b>siPTEN</b> | (Sense) GGUUUUCGAGUCCUAAUUAtt     |
|               | (Antisense) UAAUUAGGACUCGAAAACcTt |

**Table S3. The primers used for colony PCR**

|                           |                                                   |
|---------------------------|---------------------------------------------------|
| <b>PTEN<br/>wide-type</b> | (F) ATGAGCTCATGTGAAGGTCTGAATGAGG                  |
|                           | (R) GCAAGCTTTTCAAGAGGAGCTACAAAGG                  |
| <b>PTEN<br/>mut-1</b>     | (F) GGAAAAATGGCATTATATATGTTGTGTATATAAATATATATTATA |
|                           | (R) TATAATATATATTTATATAACACATATATAATGCCATTTTTCC   |
| <b>PTEN<br/>mut-2</b>     | (F) TATTATATATATAAATATATGTTGTGCATACTCTCCTTACTTTAT |
|                           | (R) ATAAAGTAAGGAGAGTATGCACAACATATATTTATATATATAATA |
